# Supplementary material for: Convenient preparations of azo-dye labeled amino acids and amines
Source: Royal Society of Chemistry journal article supplement (doi:10.1039/b802846j), 2008-01-01
Supplement: b802846j.pdf [file b802846j.pdf]

## **Electronic Supplementary Information**

### **Convenient Preparations of Azo-Dye Labelled Amino Acids and Amines**

Alan Roy Katritzky,\* Qi-Yin Chen and Srinivasa Rao Tala

*Center for Heterocyclic Compounds, Department of Chemistry,*

*University of Florida, Gainesville, FL 32611-7200, USA*

| <b>Contents</b>                                             | <b>Page</b> |
|-------------------------------------------------------------|-------------|
| 1. General & experimental procedures with all spectral data | 2-9         |

## Experimental Section

### General Methods:

Melting points were determined on Fisher melting apparatus.  $^1\text{H}$  NMR (300 MHz) and  $^{13}\text{C}$  NMR (75 MHz) spectra were recorded on a 300 MHz NMR spectrometer in  $\text{CDCl}_3$  or  $\text{DMSO-d}_6$ . HPLC analyses were performed on Beckman system gold programmable solvent module 126, using Chirobiotic T column ( $4.6 \times 250$  mm), detection at 254 nm, flow rate of 1.0 mL/min and MeOH as eluting solvent. Elemental analyses were performed on a Carlo Erba-1106 instrument. Optical rotation values were measured with the use of sodium D line. Arylazobenzoic acids, amino acids, and amines were purchased from Fisher or Aldrich chemical company.

**General procedure for preparation of *N*-(4-aryloxy)benzoyl-benzotriazoles (3a-b):** Arylazobenzoic acid **1** (7.43 mmol, 2.0 g for **1a**, 1.68 g for **1b**), 1-(methylsulfonyl)-1*H*-benzotriazole **2<sup>9d</sup>** (1.46 g, 7.43 mmol),  $\text{Et}_3\text{N}$  (1.5 mL, 10.4 mmol) were mixed in THF at room temperature. After refluxing for 5h, the reaction mixture was cooled to room temperature and kept overnight at room temperature, then solid was precipitated. After filtration and drying under vacuum, the corresponding product, *N*-(4-aryloxybenzoyl)-benzotriazoles **3a-b**, were obtained.

**4-[(4-Dimethylamino)phenylazo]benzoyl-1*H*-benzotriazole (3a).** (2.24 g, 81%). Red microcrystal; mp 210.0–212.0°C (from THF); (Found: C, 68.27; H, 4.77; N, 22.59. Calc. for  $\text{C}_{21}\text{H}_{18}\text{N}_6\text{O}$ : C, 68.09; H, 4.90; N, 22.69%);  $\delta_{\text{H}}$ (300 MHz;  $\text{CDCl}_3$ ) 8.42 (1H, d,  $J$  8.4, Ar*H*), 8.38 (2H, d,  $J$  8.7, Ar*H*), 8.19 (1H, d,  $J$  8.1, Ar*H*), 7.97 (4H, dd,  $J_1 = J_2$  8.4, Ar*H*), 7.72 (1H, t,  $J$  7.2, Ar*H*), 7.56 (1H, t,  $J$  8.4, Ar*H*), 6.77 (2H, d,  $J$  9.0, Ar*H*) and 3.13 (6H, s,  $2 \times \text{NCH}_3$ , );  $\delta_{\text{C}}$ (75 MHz,  $\text{CDCl}_3$ ) 170.0, 166.3, 156.4, 153.2, 145.9, 143.9, 133.1, 132.6, 131.1, 130.5, 126.5, 125.8, 122.1, 120.3, 115.0, 111.6 and 40.4.

**4-Phenylazobenzoyl-1*H*-benzotriazole (3b).** (2.2 g, 84%). Red microcrystal; mp 203.0–204.0 °C (from THF) (Found: C, 70.06; H, 3.80; N, 21.37. Calc. for  $\text{C}_{19}\text{H}_{13}\text{N}_5\text{O}$ : C, 69.71; H, 4.00; N, 21.39%);  $\delta_{\text{H}}$ (300 MHz;  $\text{CDCl}_3$ ) 8.44-8.39 (3H, m, Ar*H*), 8.20 (1H, d,  $J$  8.4, Ar*H*), 8.09 (2H, d,  $J$  8.4, Ar*H*), 8.01-7.98 (2H, m, Ar*H*), 7.77-7.72 (1H, m, Ar*H*), 7.61-7.51 (4H, m, Ar*H*);  $\delta_{\text{C}}$ (75 MHz,  $\text{CDCl}_3$ ) 166.2, 155.4, 152.7, 145.9, 133.0, 132.5, 132.1, 130.7, 129.4, 126.6, 123.4, 122.8, 120.4, 115.0.

**General method for the preparation of carboxylic azo-dye labeled amino acids 5a-m:** *N*-(4-Arylazobenzoyl)benzotriazole **3** (200 mg, 0.54 mmol for **3a** and 0.611 mmol for **3b**, 1eq.) and amino acid **4**

(1eq.) were added to a mixture of DMF and water (3:1,v/v), and stirred at room temperature for 24h. After the evaporation of solvent, washed with CH<sub>2</sub>Cl<sub>2</sub> and drying under vacuum, the corresponding pure products **5** were obtained with high yield of 81-99%; For **5k-m**, after the evaporation of solvent, the residue was dissolved in CH<sub>2</sub>Cl<sub>2</sub> and washed with 4N HCl.

**4-[4-(Dimethylamino)phenylazo]benzoylglycine (5a)**. (175 mg, 99%). Red microcrystal; mp 238.0–240.0°C (from CH<sub>2</sub>Cl<sub>2</sub>) (lit.,<sup>4b,10</sup> mp 232-233°C);  $\delta_{\text{H}}$ (300 MHz, DMSO-*d*<sub>6</sub>; Me<sub>4</sub>Si) 8.94 (1H, t, *J* 5.7, *NH*), 8.02 (2H, d, *J* 8.7, *ArH*), 7.84 (2H, d, *J* 8.7, *ArH*), 7.83 (2H, d, *J* 9.3, *ArH*), 6.85 (2H, d, *J* 9.3, *ArH*), 3.95 (2H, d, *J* 6.0, *CH*<sub>2</sub>) and 3.08 (6H, s, 2 × *CH*<sub>3</sub>);  $\delta_{\text{C}}$ (75 MHz, DMSO-*d*<sub>6</sub>) 171.4, 165.9, 154.1, 152.9, 142.7, 134.1, 128.4, 125.1, 121.6, 111.6, 41.4 and 39.8.

**4-[4-(Dimethylamino)phenylazo]benzoyl-L-alanine (5b)**. (200 mg, 81%). Red microcrystal; mp 205–207°C (from CH<sub>2</sub>Cl<sub>2</sub>);  $[\alpha]_{\text{D}}^{25}$  +73.3 (c 2.6 in MeOH); found: C, 63.29; H, 6.05; N, 16.19. Calc. for C<sub>18</sub>H<sub>20</sub>N<sub>4</sub>O<sub>3</sub>: C, 63.51; H, 5.92; N, 16.46%;  $\delta_{\text{H}}$ (300 MHz, DMSO-*d*<sub>6</sub>; Me<sub>4</sub>Si) 8.62 (1H, d, *J* 7.2, *NH*), 8.01 (2H, d, *J* 8.1 Hz, *ArH*), 7.82 (4H, d, *J* 8.7, *ArH*), 6.85 (2H, d, *J* 9.3, *ArH*), 4.4–4.25 (1H, m, *CHCH*<sub>3</sub>), 3.08 (6H, s, 2 × *CH*<sub>3</sub>) and 1.39 (3H, d, *J* 7.5, *CHCH*<sub>3</sub>);  $\delta_{\text{C}}$ (75 MHz, DMSO-*d*<sub>6</sub>; Me<sub>4</sub>Si) 174.9, 165.2, 154.0, 152.8, 142.5, 134.4, 128.5, 125.1, 121.5, 111.6, 48.8, 39.8 and 17.4.

**4-[4-(Dimethylamino)phenylazo]benzoyl-L-phenylalanine (5c)**. (180 mg, 80%). Red microcrystal; mp 202.0–203.0 °C (from CH<sub>2</sub>Cl<sub>2</sub>);  $[\alpha]_{\text{D}}^{25}$  +119.4 (c 1.8 in MeOH); found: C, 69.00; H, 5.90; N, 13.28. Calc. for C<sub>24</sub>H<sub>24</sub>N<sub>4</sub>O<sub>3</sub>: C, 69.21; H, 5.81; N, 13.45%;  $\delta_{\text{H}}$ (300 MHz, DMSO-*d*<sub>6</sub>; Me<sub>4</sub>Si) 8.80 (1H, d, *J* 7.8, *NH*), 7.94 (2H, d, *J* 8.4, *ArH*), 7.83-7.78 (4H, m, *ArH*), 7.34-7.18 (5H, m, *ArH*), 6.85 (2H, d, *J* 9.3, *ArH*), 4.66-4.59 (1H, m, *CHCH*<sub>2</sub>), 3.24–3.18 (2H, m, *CHCH*<sub>2</sub>) and 3.08 (6H, s, 2 × *CH*<sub>3</sub>);  $\delta_{\text{C}}$ (75 MHz, DMSO-*d*<sub>6</sub>; Me<sub>4</sub>Si) 173.3, 165.8, 154.1, 152.8, 142.6, 138.2, 134.1, 129.1, 128.5, 128.2, 126.3, 125.1, 121.5, 111.6, 54.4, 39.8 and 36.3.

**4-[4-(Dimethylamino)phenylazo]benzoyl-L-typtophan (5d)**. (220 mg, 90%). Red microcrystal; mp 220.0–222.0°C (from CH<sub>2</sub>Cl<sub>2</sub>);  $[\alpha]_{\text{D}}^{25}$  +112.1 (c 2.6 in MeOH); found: C, 67.13; H, 5.57; N, 15.42. Calc. for C<sub>26</sub>H<sub>25</sub>N<sub>5</sub>O<sub>3</sub>·1/2H<sub>2</sub>O: C, 67.23; H, 5.64; N, 15.08%;  $\delta_{\text{H}}$ (300 MHz, DMSO-*d*<sub>6</sub>; Me<sub>4</sub>Si) 10.80 (1H, s, *COOH*), 8.53 (1H, s, *NHCO*), 7.95 (2H, d, *J* 8.4, *ArH*), 7.80 (4H, t, *J* 7.8, *ArH*), 7.60 (1H, d, *J* 7.8, *ArH*), 7.31 (1H, d, *J* 8.1, *ArH*), 7.21 (1H, s, =*CHNH*), 7.04 (1H, t, *J* 7.2, *ArH*), 6.96 (1H, t, *J* 7.5, *ArH*), 6.84 (2H, d, *J* 9.3, *ArH*), 4.68-

4.58 (1H, m, CHCH<sub>2</sub>), 3.41–3.19 (3H, m, CHCH<sub>2</sub> and NHCH=) and 3.07 (6H, s, 2 × CH<sub>3</sub>); δ<sub>C</sub>(75 MHz, DMSO-*d*<sub>6</sub>; Me<sub>4</sub>Si) 165.7, 154.1, 152.9, 142.7, 136.2, 134.7, 128.6, 127.5, 125.2, 123.6, 121.5, 120.9, 118.3, 111.6, 111.4, 111.1, 55.0, 54.6, 39.9 and 27.1.

**4-[4-(Dimethylamino)phenylazo]benzoyl-L-isoleucine (5e).** (220 mg, 87%). Red microcrystal; mp 232.0–234.0°C (from CH<sub>2</sub>Cl<sub>2</sub>); [α]<sub>D</sub><sup>25</sup> +52.2 (c 2.5 in MeOH); found: C, 60.29; H, 7.43; N, 13.18. Calc. for C<sub>21</sub>H<sub>26</sub>N<sub>4</sub>O<sub>3</sub>·2H<sub>2</sub>O: C, 60.27; H, 7.23; N, 13.39%; δ<sub>H</sub>(300 MHz, DMSO-*d*<sub>6</sub>; Me<sub>4</sub>Si) 8.43 (1H, d, *J* 6.6, *NH*), 8.02 (2H, d, *J* 8.4, *ArH*), 7.82 (4H, d, *J* 8.4, *ArH*), 6.85 (2H, d, *J* 9.0, *ArH*), 4.33 (1H, t, *J* 7.2, *NHCH*), 3.07 (6H, s, 2 × CH<sub>3</sub>), 2.05–1.90 (1H, m, CHCH<sub>2</sub>), 1.59–1.51 (1H, m, CHCH<sub>2</sub>), 1.33–1.22 (1H, m, CHCH<sub>2</sub>), 0.94 (3H, d, *J* 6.9, CHCH<sub>3</sub>) and 0.88 (3H, t, *J* 7.2, CH<sub>2</sub>CH<sub>3</sub>); δ<sub>C</sub>(75 MHz, DMSO-*d*<sub>6</sub>; Me<sub>4</sub>Si) 166.0, 154.1, 152.8, 142.6, 134.5, 128.7, 125.1, 121.4, 111.6, 57.7, 39.8, 36.0, 15.7 and 11.2.

**4-[4-(Dimethylamino)phenylazo]benzoyl-L-methionine (5f).** (175 mg, 81%). Red microcrystal; mp 205.0–207.0°C (from CH<sub>2</sub>Cl<sub>2</sub>); [α]<sub>D</sub><sup>25</sup> +31.1 (c 2.6 in MeOH); found: C, 59.96; H, 6.19; N, 13.65. Calc. for C<sub>20</sub>H<sub>24</sub>N<sub>4</sub>O<sub>3</sub>S: C, 59.98; H, 6.04; N, 13.99%; δ<sub>H</sub>(300 MHz, DMSO-*d*<sub>6</sub>; Me<sub>4</sub>Si) 8.75 (1H, d, *J* 7.8, *NH*), 8.03 (2H, d, *J* 8.7, *ArH*), 7.83 (4H, d, *J* 8.4, *ArH*), 6.85 (2H, d, *J* 9.3, *ArH*), 4.57–4.50 (1H, m, *NHCH*), 3.08 (6H, s, 2 × CH<sub>3</sub>), 2.64–2.50 (2H, m, CH<sub>2</sub>S), 2.11–2.05 (2H, m, CHCH<sub>2</sub>) and 2.07 (3H, s, SCH<sub>3</sub>); δ<sub>C</sub>(75 MHz, DMSO-*d*<sub>6</sub>; Me<sub>4</sub>Si) 173.5, 166.1, 154.1, 152.9, 142.6, 134.2, 128.7, 125.1, 121.5, 111.6, 51.8, 39.8, 30.3, 30.1 and 14.6.

**4-[4-(Dimethylamino)phenylazo]benzoyl-L-serine (5g).** (170 mg, 88%). Red microcrystal; mp 205.0–207.0°C (from CH<sub>2</sub>Cl<sub>2</sub>); [α]<sub>D</sub><sup>25</sup> +60.0 (c 2.8 in MeOH); found: C, 59.49; H, 5.69; N, 15.22. Calc. for C<sub>18</sub>H<sub>20</sub>N<sub>4</sub>O<sub>4</sub>·1/3H<sub>2</sub>O: C, 59.66; H, 5.75; N, 15.46%; δ<sub>H</sub>(300 MHz, DMSO-*d*<sub>6</sub>; Me<sub>4</sub>Si) 8.53 (1H, d, *J* 7.5, *NH*), 8.05 (2H, d, *J* 8.4, *ArH*), 7.86–7.82 (4H, m, *ArH*), 6.85 (2H, d, *J* 7.5, *ArH*), 4.58–4.45 (1H, m, *NHCH*), 3.82 (2H, d, *J* 5.1, CHCH<sub>2</sub>) and 3.08 (6H, s, 2 × CH<sub>3</sub>); δ<sub>C</sub>(75 MHz, DMSO-*d*<sub>6</sub>; Me<sub>4</sub>Si) 172.0, 165.8, 154.1, 152.8, 142.7, 134.2, 128.6, 125.1, 121.5, 111.6, 61.2, 55.8 and 39.8.

**4-[4-(Dimethylamino)phenylazo]benzoyl-DL-phenylalaine (5h).** (185 mg, 82%). Red microcrystal; mp 203.0–204.0°C (from CH<sub>2</sub>Cl<sub>2</sub>); found: C, 69.02; H, 5.96; N, 13.23. Calc. for C<sub>24</sub>H<sub>24</sub>N<sub>4</sub>O<sub>3</sub>: C, 69.21; H, 5.81; N, 13.45%; δ<sub>H</sub>(300 MHz, DMSO-*d*<sub>6</sub>; Me<sub>4</sub>Si) 8.82 (1H, d, *J* 8.1, *NH*), 7.94 (2H, d, *J* 8.4, *ArH*), 7.83–7.79 (4H, m, *ArH*), 7.34–7.16 (5H, m, *ArH*), 6.85 (2H, d, *J* 9.3, *ArH*), 4.68–4.58 (1H, m, *NHCH*), 3.24–3.05 (2H, m, CHCH<sub>2</sub>)

and 3.08 (6H, s, 2 × CH<sub>3</sub>); δ<sub>C</sub>(75 MHz, DMSO-*d*<sub>6</sub>; Me<sub>4</sub>Si) 173.2, 165.8, 154.1, 152.8, 142.7, 138.3, 134.1, 129.1, 128.5, 128.2, 126.4, 125.1, 121.5, 111.6, 54.4, 39.8 and 36.3.

**4-[(4-Dimethylamino)phenylazo]benzoyl-DL-phenylglycine (5i).** (190 mg, 88%). Red microcrystal; mp 189–191°C (from CH<sub>2</sub>Cl<sub>2</sub>) (lit.,<sup>7-8</sup> 188-190°C); δ<sub>H</sub>(300 MHz, DMSO-*d*<sub>6</sub>; Me<sub>4</sub>Si) 9.17 (1H, d, *J* 7.5 Hz, NH), 8.09 (2H, d, *J* 8.4, ArH), 7.92 (1H, br s, COOH), 7.84 (4H, d, *J* 9.0, ArH), 7.55-7.32 (5H, m, ArH), 6.85 (2H, d, *J* 9.0, ArH), 5.64 (1H, d, *J* 7.2, NHCH) and 3.08 (6H, s, 2 × CH<sub>3</sub>); δ<sub>C</sub>(75 MHz, DMSO-*d*<sub>6</sub>; Me<sub>4</sub>Si) 171.9, 165.7, 154.1, 152.8, 142.7, 137.2, 134.0, 130.5, 128.9, 128.4, 128.2, 127.9, 125.3, 125.1, 121.7, 121.4, 111.6, 57.0 and 39.8.

**4-[4-(Dimethylamino)phenylazo]benzoyl-6-aminocaproic acid (5j).** (197 mg, 95%). Red microcrystal; mp 208.0–210.0°C (from CH<sub>2</sub>Cl<sub>2</sub>); found: C, 65.57; H, 6.85; N, 14.55. Calc. for C<sub>21</sub>H<sub>26</sub>N<sub>4</sub>O<sub>3</sub>: C, 65.95; H, 6.85; N, 14.65%; δ<sub>H</sub>(300 MHz, DMSO-*d*<sub>6</sub>; Me<sub>4</sub>Si) 8.56 (1H, t, *J* 5.7, NH), 7.98 (2H, d, *J* 8.4, ArH), 7.84-7.80 (4H, m, ArH), 6.85 (2H, d, *J* 9.3, ArH), 3.34-3.23 (2H, m, NHCH<sub>2</sub>), 3.08 (6H, s, 2 × CH<sub>3</sub>), 2.22 (2H, t, *J* 7.2, CH<sub>2</sub>CO), 1.59-1.49 (4H, m, NHCH<sub>2</sub>CH<sub>2</sub> and CH<sub>2</sub>CH<sub>2</sub>CO) and 1.37-1.28 (2H, m, NHCH<sub>2</sub>CH<sub>2</sub>CH<sub>2</sub>CH<sub>2</sub>CH<sub>2</sub>CO); δ<sub>C</sub>(75 MHz, DMSO-*d*<sub>6</sub>; Me<sub>4</sub>Si) 174.5, 165.5, 153.9, 152.8, 142.6, 135.0, 128.3, 125.1, 121.5, 111.6, 39.8, 39.2, 33.7, 28.9, 26.1 and 24.3.

**4-Phenylazobenzoyl-L-leucine (5k).** (170 mg, 86%). Off red microcrystal; mp 120.0–122.0°C (from CH<sub>2</sub>Cl<sub>2</sub>/Hexane) (lit.,<sup>8c</sup> mp 173°C); [α]<sub>D</sub><sup>25</sup> 9.0 (c 2.5 in MeOH); found: C, 65.59; H, 6.21; N, 12.08. Calc. for C<sub>19</sub>H<sub>21</sub>N<sub>3</sub>O<sub>3</sub>·1/2H<sub>2</sub>O: C, 65.50; H, 6.36; N, 12.06; δ<sub>H</sub>(300 MHz, CDCl<sub>3</sub>) 7.95-7.90 (6H, m, ArH), 7.56-7.51 (3H, m, ArH), 6.73 (1H, d, *J* 7.8, NH), 4.91-4.84 (1H, m, NHCH), 1.88-1.72 (3H, m, CH<sub>2</sub>CHCH<sub>3</sub>) and 1.01 (6H, d, *J* 4.5, 2 × CH<sub>3</sub>); δ<sub>C</sub>(75 MHz, CDCl<sub>3</sub>) 176.7, 167.6, 154.5, 152.5, 135.3, 131.7, 129.2, 128.4, 123.2, 123.0, 51.6, 41.2, 25.1, 23.0 and 22.0.

**4-Phenylazobenzoyl-L-phenylalanine (5l).** (216 mg, 95%). Off red microcrystal; mp 185–186°C (from CH<sub>2</sub>Cl<sub>2</sub>/Hexane) (lit.,<sup>7</sup> mp 183-184°C); [α]<sub>D</sub><sup>25</sup> +103.0 (c 2.4 in MeOH); δ<sub>H</sub>(300 MHz, DMSO-*d*<sub>6</sub>; Me<sub>4</sub>Si) 8.93 (1H, d, *J* 7.8, NH), 8.03-7.94 (6H, m, ArH), 7.62 (3H, br s, ArH), 7.33-7.19 (6H, m, ArH), 4.68-4.60 (1H, m, NHCH) and 3.26-3.06 (2H, m, CHCH<sub>2</sub>); δ<sub>C</sub>(75 MHz, DMSO-*d*<sub>6</sub>; Me<sub>4</sub>Si) 173.2, 165.6, 153.4, 151.9, 138.2, 136.1, 132.1, 129.6, 129.1, 128.7, 128.2, 126.4, 122.8, 122.4, 54.5 and 36.3.

**4-Phenylazobenzoyl-L-alanine (5m).** (158 mg, 87%). Off red microcrystal; mp 222–224°C (from CH<sub>2</sub>Cl<sub>2</sub>/Hexane) (lit.,<sup>8c</sup> 220°C); [ $\alpha$ ]<sub>D</sub><sup>25</sup> +29.3 (c 2.5 in MeOH);  $\delta_{\text{H}}$ (300 MHz, DMSO-*d*<sub>6</sub>; Me<sub>4</sub>Si) 8.89 (1H, d, *J* 7.2, *NH*), 8.12 (2H, d, *J* 8.4, *ArH*), 7.99-7.94 (4H, m, *ArH*), 7.64-7.62 (3H, m, *ArH*), 4.50-4.44 (1H, m, *NHCH*) and 1.43 (3H, d, *J* 7.5, *CH*<sub>3</sub>);  $\delta_{\text{C}}$ (75 MHz, DMSO-*d*<sub>6</sub>; Me<sub>4</sub>Si) 174.2, 165.4, 153.4, 151.9, 136.1, 132.1, 129.6, 128.8, 122.8, 122.4, 48.3 and 16.9.

**General procedure for the preparation of 7a-f: Procedure A:** *N*-[[4-(*p*-Dimethylaminophenylazo)]benzoyl]benzotriazole (**3**) (200 mg, 0.54 mmol for **3a** and 0.611 mmol for **3b**) and corresponding amines (1-3eq.) were mixed in THF (10mL) and stirred for 1-48 hours at room temperature (monitored by TLC). After the evaporation of solvent, pure products **7** were obtained from the residues after simple purification procedures with high yield of 85-100%.

**4-[4-(Dimethylamino)phenylazo]benzoyl-morpholine (7a).** 1eq. **6a**; purified with column on silica gel eluting with ethyl acetate/hexane (1:2, v/v) to give **7a** as red microcrystal (184 mg, 100%); mp 212.0–215.0°C (from EtOAc/Hexane); found: C, 67.57; H, 6.66; N, 16.57. Calc. for C<sub>19</sub>H<sub>22</sub>N<sub>4</sub>O<sub>2</sub>: C, 67.44; H, 6.55; N, 15.56%;  $\delta_{\text{H}}$ (300 MHz, CDCl<sub>3</sub>) 7.88 (4H, t, *J* 8.1, *ArH*), 7.52 (2H, d, *J* 8.1, *ArH*), 6.76 (2H, d, *J* 9.0, *ArH*), 3.85-3.40 (8H, br s, *CH*<sub>2</sub>*CH*<sub>2</sub>) and 3.11 (6H, s, 2 × *CH*<sub>3</sub>);  $\delta_{\text{C}}$ (75 MHz, CDCl<sub>3</sub>) 170.1, 154.0, 152.8, 143.6, 135.6, 128.1, 125.4, 122.3, 111.5, 66.9, 40.3 and 29.8.

**4-[4-(Dimethylamino)phenylazo]benzoyl-*n*-butylamine (7b).** 1eq. **6b**; worked up with MeOH to give **7b** as red microcrystal (180 mg, 93%); mp 212.0–214.0°C (from MeOH); found: C, 70.58; H, 7.64; N, 17.37. Calc. for C<sub>19</sub>H<sub>24</sub>N<sub>4</sub>O: C, 70.34; H, 7.46; N, 17.27%;  $\delta_{\text{H}}$ (300 MHz, CDCl<sub>3</sub>) 7.89 (2H, d, *J* 9.3, *ArH*), 7.86 (4H, s, *ArH*), 6.75 (2H, d, *J* 8.7, *ArH*), 6.18 (1H, br s, *NH*), 3.48 (2H, q, *J* 6.6, *NHCH*<sub>2</sub>), 3.10 (6H, s, 2 × *NCH*<sub>3</sub>), 1.67-1.58 (2H, m, *NHCH*<sub>2</sub>*CH*<sub>2</sub>), 1.49-1.37 (2H, m, *CH*<sub>2</sub>*CH*<sub>3</sub>) and 0.97 (3H, t, *J* 7.2, *CH*<sub>3</sub>);  $\delta_{\text{C}}$ (75 MHz, CDCl<sub>3</sub>) 167.2, 155.1, 152.9, 143.7, 134.9, 127.9, 125.5, 122.3, 111.6, 40.4, 40.0, 31.9, 29.8, 20.3 and 13.9.

**4-[4-(Dimethylamino)phenylazo]benzoyl-*tert*-butylamine (7c).** 3eq. **6c**; worked up with MeOH to give **7c** as red microcrystal (148 mg, 85 %); mp 228.0–230.0°C (from MeOH); found: C, 7.48; H, 7.85; N, 17.12. Calc. for C<sub>19</sub>H<sub>24</sub>N<sub>4</sub>O: C, 70.34; H, 7.46; N, 17.27%;  $\delta_{\text{H}}$ (300 MHz, CDCl<sub>3</sub>) 7.91-7.80 (6H, m, *ArH*), 6.76 (2H, d, *J* 9.3, *ArH*), 5.98 (1H, s, *NH*), 3.10 (6H, s, 2 × *NCH*<sub>3</sub>) and 1.50 (9H, s, 3 × *CCH*<sub>3</sub>);  $\delta_{\text{C}}$ (75 MHz, CDCl<sub>3</sub>) 166.5, 154.9,

152.8, 143.7, 136.0, 127.7, 125.4, 122.2, 111.5, 51.8, 40.4 and 29.0.

**4-[4-(Dimethylamino)phenylazo]benzoyl-2-(ethylamino)-ethanol (7d).**<sup>3i</sup> 1eq. **6d**; purified with column on silica gel eluting with CH<sub>2</sub>Cl<sub>2</sub>/MeOH (10:1, v/v) to give **7d** as red microcrystal (180 mg, 94%); mp 176.0–178.0°C (from MeOH); found: C, 64.38; H, 6.94; N, 15.85. Calc. for C<sub>19</sub>H<sub>24</sub>N<sub>4</sub>O<sub>3</sub>: C, 64.03; H, 6.79; N, 15.72%; δ<sub>H</sub>(300 MHz, CDCl<sub>3</sub>) 7.89–7.82 (6H, m, ArH), 6.92 (1H, s, NH), 6.74 (2H, d, *J* 8.7, ArH), 3.75 (2H, br s, NHCH<sub>2</sub>), 3.67 (4H, br s, CH<sub>2</sub>OCH<sub>2</sub>), 3.62–3.59 (2H, m, CH<sub>2</sub>OH), 3.09 (6H, s, 2 × CH<sub>3</sub>) and 2.66 (br s, 1H, OH); δ<sub>C</sub>(75 MHz, CDCl<sub>3</sub>) 167.4, 155.1, 152.9, 143.7, 134.6, 128.0, 125.5, 122.3, 111.6, 72.4, 70.0, 61.9, 40.4 and 40.0.

**4-[4-(Dimethylamino)phenylazo]benzoyl-6-amino-1-hexanol (7e).** 1.1eq. **6e**; worked up with CH<sub>2</sub>Cl<sub>2</sub> to give **7e** as red microcrystal (93%); mp 150.0–152.0°C (from CH<sub>2</sub>Cl<sub>2</sub>); found: C, 64.00; H, 7.49; N, 14.21. Calc. for C<sub>21</sub>H<sub>28</sub>N<sub>4</sub>O<sub>2</sub>·4/3H<sub>2</sub>O C, 64.26; H, 7.88; N, 14.27; δ<sub>H</sub>(300 MHz; DMSO-*d*<sub>6</sub>; Me<sub>4</sub>Si) 8.57 (1H, t, *J* 5.1, NH), 7.98 (2H, d, *J* 8.4, ArH), 7.84–7.80 (4H, m, ArH), 6.85 (2H, d, *J* 9.0, ArH), 4.38 (1H, br s, OH), 3.30–3.24 (4H, m, NHCH<sub>2</sub> and CH<sub>2</sub>OH), 3.08 (6H, s, 2 × CH<sub>3</sub>) and 1.54–1.32 (8H, m, CH<sub>2</sub>(CH<sub>2</sub>)<sub>4</sub>CH<sub>2</sub>); δ<sub>C</sub>(75 MHz; DMSO-*d*<sub>6</sub>; Me<sub>4</sub>Si) 165.5, 153.9, 152.8, 142.6, 135.0, 128.3, 125.1, 121.5, 111.6, 60.7, 39.8, 39.3, 32.5, 29.2, 26.5 and 25.3.

**4-[4-(Dimethylamino)phenylazo]benzoyl-L-α-methylbenzyl-amine (7f).**<sup>13</sup> 1.3eq **6f**; worked up with MeOH to give **7f** as red microcrystal (176 mg, 88%); mp 222–224°C (from MeOH); [α]<sub>D</sub><sup>25</sup> +250.0 (c 2.3 in MeOH); retention time: 3.45; found: C, 72.99; H, 6.46; N, 14.81. Calc. for C<sub>23</sub>H<sub>24</sub>N<sub>4</sub>O·1/3H<sub>2</sub>O: C, 72.99; H, 6.57; N, 14.80%; δ<sub>H</sub>(300 MHz, CDCl<sub>3</sub>) 7.91–7.87 (6H, m, ArH), 7.43–7.29 (5H, m, ArH), 6.76 (2H, d, *J* 9.3, ArH), 6.37 (1H, d, *J* 7.5, NH), 5.41–5.32 (1H, m, CHCH<sub>3</sub>), 3.11 (6H, s, 2 × NCH<sub>3</sub>) and 1.63 (3H, d, *J* 6.9, CHCH<sub>3</sub>); δ<sub>C</sub>(75 MHz, CDCl<sub>3</sub>) 166.2, 155.1, 152.8, 143.6, 143.2, 134.6, 128.8, 127.9, 127.5, 126.3, 125.4, 122.3, 111.5, 49.3, 40.3 and 21.8.

**The preparation of 7g, 7h: Procedure B.** 4-[(4-Dimethylamino)phenylazo]benzoyl-1*H*-benzotriazole (**3a**) (200 mg, 0.54 mmol) was added to the solution of amine (1-3eq.) and Et<sub>3</sub>N (3.0 eq.) in THF (10ml) at room temperature. The mixture was heated under reflux for 24 hours. After filtration, the solvent was evaporated under reduced pressure. Pure products were obtained from the residues after simple purification procedures.

**4-[4-(Dimethylamino)phenylazo]benzoyl-L-valine methyl ester (7g).** 1.0eq. **6g**; purified with column on silica

gel eluting with ethyl acetate/hexanes (1:3, v/v) to give **7g** as red microcrystal (188 mg, 90%); mp 156.0–158.0°C (from EtOAc/Hexane);  $[\alpha]_D^{25} +59.6$  (c 2.8 in MeOH); retention time: 3.29; found: C, 66.05; H, 6.94; N, 14.37. Calc. for  $C_{21}H_{26}N_4O_3$ : C, 69.95; H, 6.85; N, 14.65%;  $\delta_H$ (300 MHz,  $CDCl_3$ ) 7.90 (6H, m, ArH), 6.76 (2H, d,  $J$  9.0, ArH), 6.67 (1H, d,  $J$  8.4, NH), 4.83-4.79 (1H, m,  $J$  5.1, 3.6, NHCH), 3.79 (3H, s,  $OCH_3$ ), 3.12 (6H, s,  $2 \times NCH_3$ ), 2.33-2.27 (1H, m, CHCH<sub>3</sub>) and 1.02 (6H, t,  $J$  6.6,  $2 \times CHCH_3$ );  $\delta_C$ (75 MHz,  $CDCl_3$ ) 172.8, 167.0, 155.4, 152.9, 143.7, 134.2, 128.1, 125.6, 122.4, 111.6, 57.6, 52.4, 40.4, 31.8, 19.2 and 18.2.

**4-[4-(Dimethylamino)phenylazo]benzoyl-*p*-toluidine (7h)**. 3.0eq. **6h**; worked up with MeOH to give **7h** as red microcrystal (166 mg, 86%); mp 263.0–265.0°C (from MeOH); found: C, 73.94; H, 6.40; N, 15.57. Calc. for  $C_{22}H_{22}N_4O$ : C, 73.72; H, 6.19; N, 15.63%;  $\delta_H$ (300 MHz; DMSO- $d_6$ ; Me<sub>4</sub>Si) 10.28 (1H, s, NH), 8.11 (2H, d,  $J$  8.4, ArH), 7.86 (4H, t,  $J$  8.7, 10.2, ArH), 7.69 (2H, d,  $J$  8.1, ArH), 7.17 (2H, d,  $J$  8.1, ArH), 6.86 (2H, d,  $J$  9.0, ArH), 3.09 (6H, s,  $2 \times NCH_3$ ) and 2.29 (3H, s,  $PhCH_3$ );  $\delta_C$ (75 MHz; DMSO- $d_6$ ; Me<sub>4</sub>Si) 164.7, 154.1, 152.9, 142.6, 136.6, 135.1, 132.7, 129.0, 128.8, 125.2, 121.6, 120.4, 111.6, 39.8 and 20.5.

**General procedure for the preparation of 7i-k: Procedure C:** *N*-[[4-(*p*-Dimethylaminophenylazo)]benzoyl]benzotriazole (**3a**) (200 mg, 0.54 mmol) and corresponding amine (2.0-3.0 eq.), Et<sub>3</sub>N (0.23mL, 1.62 mmol) were mixed in DMF (10mL). The mixture was heated at 150°C for 5-10 hours. After the evaporation of solvent under reduced pressure, the residue was worked up with MeOH and the products were obtained as red solids.

**4-[4-(Dimethylamino)phenylazo]benzoyl-*N*-methylaniline (7i)**. 3eq. **6i**; worked up with MeOH to give **7i** as red microcrystal (140 mg, 74%); mp 185.0–187.0°C (from MeOH); found: C, 73.38; H, 6.35; N, 15.71. Calc. for  $C_{22}H_{22}N_4O$ : C, 73.72; H, 6.19; N, 15.63%;  $\delta_H$ (300 MHz; DMSO- $d_6$ ; Me<sub>4</sub>Si) 7.75 (2H, d,  $J$  7.5, ArH), 7.57 (2H, d,  $J$  6.9, ArH), 7.38 (2H, d,  $J$  7.8, ArH), 7.27 (2H, d,  $J$  6.6, ArH), 7.20 (3H, d,  $J$  6.3, ArH), 6.82 (2H, d,  $J$  7.8, ArH), 3.40 (3H, s,  $CONCH_3$ ) and 3.06 (6H, s,  $2 \times NCH_3$ );  $\delta_C$ (75 MHz; DMSO- $d_6$ ; Me<sub>4</sub>Si) 168.9, 152.7, 152.4, 144.4, 142.6, 136.8, 129.3, 129.1, 127.1, 126.5, 125.0, 121.0, 111.5, 39.8 and 37.8.

**4-[4-(Dimethylamino)phenylazo]benzoyl-2-aminopyridine (7j)**. 3 eq. **6j**; worked up with MeOH to give **7j** as red microcrystal (157 mg, 84%); mp 190.0–192.0°C (from MeOH); found: C, 69.34; H, 5.64; N, 20.30. Calc. for  $C_{20}H_{19}N_5O$ : C, 69.55; H, 5.54; N, 20.28;  $\delta_H$ (300 MHz; DMSO- $d_6$ ; Me<sub>4</sub>Si) 10.90 (1H, s, NH), 8.42-8.40 (1H, m, ArH), 8.22 (1H, d,  $J$  8.4, ArH), 8.18 (2H, d,  $J$  8.7, ArH), 7.89-7.83 (5H, m, ArH), 7.20-7.16 (1H, m, ArH), 6.87



(2H, d, *J* 9.3, *ArH*) and 3.09 (6H, s, 2 × *CH*<sub>3</sub>); δ<sub>C</sub>(75 MHz; DMSO-*d*<sub>6</sub>; Me<sub>4</sub>Si) 165.4, 154.4, 152.9, 152.2, 148.0, 142.7, 138.1, 134.2, 129.3, 125.2, 121.5, 119.9, 114.8, 111.6 and 39.8.

**4-[4-(Dimethylamino)phenylazo]benzoyl-carbazole (7k).** 2eq. **6k**; worked up with MeOH to give **7k** as red microcrystal (183 mg, 81%); mp 204.0–206.0°C (from MeOH); found: C, 77.12; H, 5.20; N, 13.35. Calc. for C<sub>27</sub>H<sub>22</sub>N<sub>4</sub>O: C, 77.49; H, 5.30; N, 13.39%; δ<sub>H</sub>(300 MHz; DMSO-*d*<sub>6</sub>; Me<sub>4</sub>Si) 8.25-8.22 (2H, m, *ArH*), 7.94 (2H, d, *J* 8.7, *ArH*), 7.87 (4H, d, *J* 9.0, *ArH*), 7.50-7.46 (2H, m, *ArH*), 7.43-7.39 (4H, m, *ArH*), 6.87 (2H, d, *J* 9.3, *ArH*) and 3.01 (6H, s, 2 × *CH*<sub>3</sub>); δ<sub>C</sub>(75 MHz; DMSO-*d*<sub>6</sub>; Me<sub>4</sub>Si) 168.5, 154.7, 153.1, 142.7, 138.5, 135.2, 130.2, 127.0, 125.4, 123.6, 122.2, 120.4, 115.3, 111.6 and 39.9.

#### The preparation of 7l-n.

In the preparation of **7l-n**, 200 mg (0.611 mmol) of 4-phenylazobenzoyl-1*H*-benzotriazole **3b** was used.

**4-Phenylazobenzoyl-benzylamine (7l).** Procedure A; 1.2 eq. **6l**; worked up with MeOH; to give **7l** as off red microcrystal (175 mg, 91%); mp 192–193°C (from MeOH) (lit.,<sup>8b</sup>, 194–194.5°C); δ<sub>H</sub>(300 MHz; DMSO-*d*<sub>6</sub>; Me<sub>4</sub>Si) 7.99-7.93 (6H, m, *ArH*), 7.57-7.50 (3H, m, *ArH*), 7.39-7.31 (5H, m, *ArH*), 6.53 (1H, br s, *NH*) and 4.68 (2H, d, *J* 5.4, *NHCH*<sub>2</sub>); δ<sub>C</sub>(75 MHz; DMSO-*d*<sub>6</sub>; Me<sub>4</sub>Si) 166.8, 154.4, 152.6, 138.1, 136.2, 131.7, 129.3, 128.9, 128.1, 127.8, 123.2, 123.0 and 44.4.

**4-Phenylazobenzoyl-m-toluidine (7m).** Procedure D; 3 eq. **6m**; worked up with MeOH to give **7m** as off red microcrystal (165 mg, 86%); mp 168.0–169.0°C (from MeOH) (lit.,<sup>8b</sup> 168.5–170.0°C); δ<sub>H</sub>(300 MHz; CDCl<sub>3</sub>) 7.98-7.89 (7H, m, *ArH*), 7.55-7.51 (4H, m, *ArH*), 7.43 (1H, d, *J* 8.1, *ArH*), 7.27-7.22 (1H, m, *ArH*), 6.97 (1H, d, *J* 7.2, *ArH*) and 2.36 (3H, s, *CH*<sub>3</sub>); δ<sub>C</sub>(75 MHz; DMSO-*d*<sub>6</sub>; Me<sub>4</sub>Si) 165.2, 154.4, 152.6, 139.2, 137.8, 136.8, 131.8, 129.3, 129.0, 128.2, 125.7, 123.2, 123.2, 121.2, 117.6 and 21.6.

**4-Phenylazobenzoyl-DL-valine methyl ester (7n).** Procedure D; 1eq **6n**; purified with column on silica gel eluting with ethyl acetate/hexanes (1:3, v/v) to give **7n** as off red microcrystal (189 mg, 91%); mp 131–132°C (from EtOAc/Hexane) (lit.,<sup>14</sup> 130–131°C); retention time: 0/3.08, 3.25; δ<sub>H</sub>(300 MHz; CDCl<sub>3</sub>) 8.00-7.94 (6H, m, *ArH*), 7.57-7.48 (3H, m, *ArH*), 6.72 (1H, d, *J* 8.4, *NH*), 4.83-4.79 (1H, m, *NHCH*), 3.78 (3H, s, *OCH*<sub>3</sub>), 2.36-2.26 (1H, m, *CHCH*<sub>3</sub>) and 1.03 (6H, t, *J* 6.9, 2 × *CHCH*<sub>3</sub>); δ<sub>C</sub>(75 MHz; DMSO-*d*<sub>6</sub>; Me<sub>4</sub>Si) 172.7, 166.7, 154.5, 152.6, 135.9, 131.7, 129.2, 128.2, 123.2, 123.0, 57.7, 52.4, 31.7, 19.1 and 18.1.
